# Supplementary material
Source: Springer Nature journal article supplement (https://www.springermedizin.de/resource/supplementary/12913_2004_90_MOESM2_ESM.pdf/9534176)

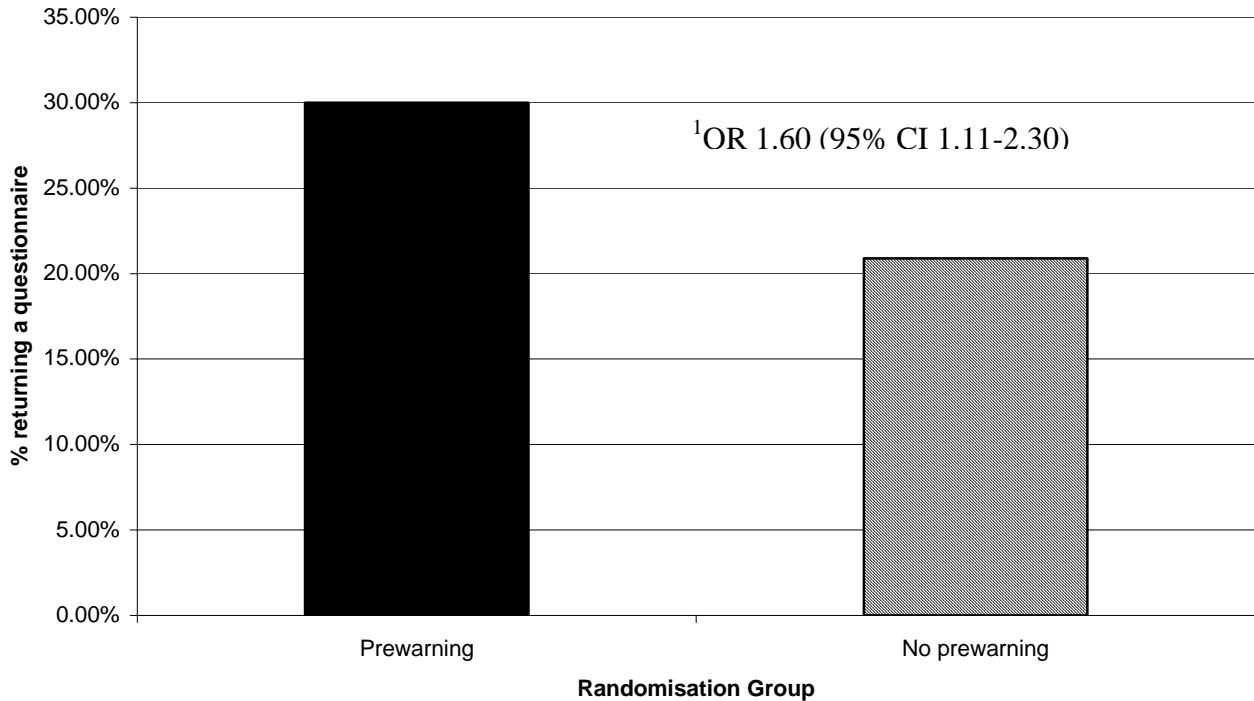

<sup>1</sup> Odds ratio adjusted for age and sex, 95% confidence intervals

Supplement: MOESM2 [file 9534176]
